1                   **Multidrug resistance and high prevalence of class 1**  
2                   **integrons in *Escherichia coli* isolated from waters and**  
3                   **vegetables in Nsukka and Enugu, Nigeria.**  
4

5   **Chinyere B. Chigor**<sup>1,2¶</sup>, **Ini-Abasi I. Ibangha**<sup>1,3&</sup>, **Nkechinyere O. Nweze**<sup>1,2¶</sup>,  
6   **Chizoba A. Ozochi**<sup>1,3¶</sup>, **Valentino C. Onuora**<sup>1,3&</sup>, **Yinka Titilawo**<sup>4¶</sup>, **Tatyana N. Chernikova**<sup>5¶</sup>,  
7   **Peter N. Golyshin**<sup>5</sup> and **Vincent N. Chigor**<sup>1,3\*</sup>

8  
9   <sup>1</sup>Water and Public Health Research Group (WPHRG), University of Nigeria, Nsukka, Enugu State,  
10   Nigeria.

11  
12   <sup>2</sup>Department of Plant Science and Biotechnology, Faculty of Biological Sciences, University  
13   Nigeria, Nsukka, Enugu State, Nigeria.

14  
15   <sup>3</sup>Department of Microbiology, Faculty of Biological Sciences, University of Nigeria, Nsukka,  
16   Enugu State, Nigeria.

17  
18   <sup>4</sup>Department of Biology/Microbiology/Biotechnology, Alex Ekwueme Federal University, Ndufu-  
19   Alike Ikwo, Ebonyi State, Nigeria.

20  
21   <sup>5</sup>School of Natural Sciences, Bangor University, Bangor Gwynedd, United Kingdom

22  
23   \*Corresponding author

24   E-mail: [vincent.chigor@unn.edu.ng](mailto:vincent.chigor@unn.edu.ng) (VNC)

25   "VNC and PNG are Joint Senior Authors"

26  
27   **Keywords:** multidrug resistance; Integrons; pathogenic *E. coli*; wastewater-irrigated vegetables;  
28   public health risks

29  
30  
31   **Running title: Multidrug resistance and class 1 integrons in *Escherichia coli***  
32  
33  
34  
35  
36  
37  
38  
39

## 40 **Abstract**

41 In spite of treated wastewater presenting itself as an attractive alternative to scarce quality water  
42 in the developing countries, the associated contamination of fresh produce by irrigation waters  
43 leading to outbreak of foodborne illnesses is on the rise. Horizontal transfer of integrons play  
44 important role in the spread and maintenance of antimicrobial resistance among strains of  
45 *Escherichia coli*. This study assessed the effluents from the University of Nigeria, Nsukka  
46 Wastewater Treatment Plant (UNN-WWTP) as well as vegetables irrigated with the effluent, and  
47 vegetables sold in selected markets from Nsukka and Enugu cities for the presence of *E. coli* and  
48 determined the prevalence integrons in multidrug-resistant isolates. Isolation of *E. coli* was done  
49 using eosin methylene blue agar and isolates subjected to Gram staining for identification of  
50 presumptive colonies. Confirmation of *E. coli* was achieved by polymerase chain reaction (PCR)  
51 technique, targeting beta-glucuronidase (*uidA*). Resistance to antibiotics was determined using the  
52 Bauer-Kirby disk diffusion assay and the Clinical and Laboratory Standard Institute criteria.  
53 Integrons were detected by multiplex PCR using primers specific for class 1 and 2 integrons. A  
54 total of 178 *E. coli* isolates were obtained from WWTP effluent (41), and vegetables from  
55 greenhouse (46), farms (55) and market (36). Multi-drug resistance was detected in all the isolates,  
56 ranging from five-drug resistance in a single isolate to 16-drug resistance patterns in two different  
57 isolates. Of the total isolates, class 1 integrons were abundantly detected in 175 (98.3%) and class  
58 2 in 5 (2.8%). All the class 2 integrons were found in isolates that were positive for class 1. The  
59 high detection of *E. coli* in the studied effluent and vegetables pose potential public health hazards  
60 heightened by observed multidrug resistance in all the isolates and the high prevalence of class 1  
61 integron. It is concluded that the vegetable samples are significant reservoirs for potentially  
62 pathogenic *E. coli*. Therefore, vegetable irrigation farming with unsafe water should be  
63 discontinued, while appropriate improvement strategies to ensure compliance should be facilitated  
64 without further delay.

65

## 66 **Introduction**

67 Pathogenic *Escherichia coli* causes significant morbidity and mortality worldwide [1-3]. Reported  
68 risk factors in the developing countries and sub-Saharan African regions include poor hygiene,  
69 unsafe water, improper disposal of waste and faeces, and contaminated food, local beverages and  
70 vegetables [2, 4, 5]. Vegetables can become contaminated with pathogenic and commensal

71 bacteria from animals and humans, during growth, harvesting, distribution, storage and processing  
72 [6]. Although the contamination of fresh produce by irrigation waters has led to outbreak of  
73 foodborne illnesses, yet treated wastewater presents itself as an attractive alternative to scarce  
74 quality water in the developing countries.

75 *E. coli* has been reported as an aetiological agent of diarrhoea in both the northern and south-  
76 western parts of Nigeria [7-12]. In a study that detected *E. coli* in 119 (44.74%) of 270 diarrhoeal  
77 stool samples in Enugu and Onitsha cities, south-eastern Nigeria [13], enterotoxigenic *E. coli*  
78 (ETEC) was reported as the second most prevalent pathotype (21.57%) after enteropathogenic *E.*  
79 *coli* (EPEC) (49.02%). Likewise, a study conducted in Nsukka, that involved watery stools,  
80 drinking water, and some fruits and vegetables collected during the rainy periods (between April  
81 and October) over 3 year sampling regime (1996 to 1998), [4] reported that enteropathogenic *E.*  
82 *coli* (EPEC) was detected in 9 (1.8%) of 500 stool samples, whereas no enteric bacterial pathogen  
83 was isolated from the fruits and vegetables. There appears to be no reports on ETEC prevalence in  
84 humans and on irrigated vegetables in Nsukka.

85 Excessive and inappropriate usage of antimicrobials in preventing or treating human and  
86 veterinary bacterial infectious diseases has led to increased antimicrobial and multidrug resistance  
87 (MDR) and the risk of transmission of antibiotic resistant bacteria (ARB) and antibiotic resistant  
88 genes (ARGs) from one country to another is a growing global challenge. [14-16] Attention should  
89 be given to how anthropogenic activities might be causing evolution of antibiotic resistance in the  
90 environment [16], and studies have shown that waste water treatment plants form a significant  
91 reservoir of resistance genes and suggested that waste water disposal increases the reservoir of  
92 resistance determinants in the environment either by the addition of resistance genes or input of  
93 agents selective for resistant phenotypes [17].

94 Along with transposons and plasmids, integrons, genetic elements commonly found in  
95 bacterial genomes that allow efficient acquisition and expression of exogenous genes, are central  
96 in the dissemination of antibiotic resistance among Gram-negative bacteria [18,19]. Horizontal  
97 transfer of integrons have been shown to play important role in the spread and maintenance of  
98 antimicrobial resistance among strains of *E. coli* and ARB can be transferred across borders by  
99 human travelers, animal and insect vectors, agricultural products and surface water [15,20]. Not  
100 much is known about the risk factors in spreading across local borders.

101 It is thought that University towns, characterized by regular and significant demographic  
102 changes arising from admissions and vacations, could play major role in dissemination of  
103 resistance determinants locally, and even internationally where the institution has a good number  
104 of internationals. Nsukka, in Southeast Nigeria, is the location of one of Nigeria's biggest  
105 universities and one also in which the town developed around the university. This study assessed  
106 the effluent from the University of Nigeria, Nsukka Wastewater Treatment Plant (UNN-WWTP)  
107 as well as vegetables irrigated with the effluent and vegetables sold in selected markets for the  
108 presence of *E. coli* and determined the prevalence integrons in multidrug-resistant isolates.

109

## 110 **Methods**

111

### 112 **Description of study area**

113 The university town of Nsukka (6.8429° N, 7.3733° E) is in Enugu State,  
114 southeast Nigeria, with an area of 1,810 km<sup>2</sup> and a population of 309,633 (NPC 2006). The sewage  
115 treatment facility (WWTP) in Nsukka, consisting of a screen, primary settling (Imhoff) tank,  
116 sludge drying beds and two oxidation ponds, is situated at the northwest end of the University of  
117 Nigeria, Nsukka. The final effluents have been widely utilized for fresh produce irrigation during  
118 dry season.

### 119 **Cultivation of *Amaranthus* in the greenhouse**

120 The most commonly cultivated vegetables in the study area, during the dry season, include  
121 the green leafy vegetable amaranth (*Amaranthus* spp), fluted pumpkin leaves (*Telfaria*  
122 *occidentalis*), scarlet eggplant leaf (*Solanum aethiopicum*) and water leaf (*Talinum fruticosum*). In  
123 this study, *Amaranthus* was chosen, being the second most produced and sold leafy vegetable,  
124 after *Telfaria* [21], and it equally grows very easily and matures faster. Amaranths were grown for  
125 10 weeks (July 26 to October 03, 2014) in earthen pots at the Soil Science Departmental  
126 greenhouse. They were irrigated daily using the sprinkler method. A total of 60 earthen pots were  
127 used for the cultivation of vegetables, 48 were irrigated with treated wastewater (final effluent of  
128 the University of Nigeria, wastewater treatment plant (WWTP) and 12 with tap water. The pots  
129 irrigated with tap water served as the control.

## 130 **Collection of Samples**

131 Samples collected for this study included treated wastewater and vegetables. Sampling was  
132 done according to the standard procedure [22]. Effluents were collected with 10 L plastic cans for  
133 irrigation of the green house vegetables. Samples of the WWTP effluent were collected using  
134 sterile wide-mouthed, screw-capped 250-ml bottles. Vegetables were obtained from the green  
135 house, irrigated gardens and local markets in Nsukka and Enugu metropolis, during December  
136 2014. Samples of the major vegetables cultivated during the dry season include fluted pumpkin  
137 leaves (*Telfaria occidentalis*), scarlet eggplant leaf (*Solanum aethiopicum*), water leaf (*Talinum*  
138 *fruticosum*) and the green vegetable (*Amaranthus* Spp) were collected. All samples were  
139 transported on ice to the laboratory and analysed within 6 h of collection.

## 140 **Isolation and identification of presumptive *E. coli***

141 This was carried out at the Water and Public Health Laboratory, University of Nigeria  
142 Nsukka. Exactly 5 g of each vegetable sample was homogenized in a clean porcelain mortar, and  
143 1 g of the homogenate diluted into 9ml normal saline [23, 24]. Serial dilutions (10-fold) were made  
144 by pipetting out 1ml stock solution into successive 9ml of sterile normal saline bottles. A 1 ml  
145 working sample dilution ( $10^{-1}$  and  $10^{-2}$ ) was spread-plated onto eosin methylene blue (EMB) agar  
146 (Oxoid, UK), incubated at 44 °C for 18-24 h. Raised, entire colonies with dark greenish metallic  
147 sheen, typical *E. coli* colonies were subjected to Gram-staining [25] and standard biochemical  
148 tests (IMViC). All presumptive *E. coli* isolates were sub-cultured in tryptic soy broth (Oxoid, UK)  
149 and then stored at -20 °C for further investigations. All media were prepared following the  
150 manufacturers' instructions.

## 151 **Extraction of genomic DNA**

152 Genomic DNA were extracted from a pure culture of each isolate grown overnight on  
153 nutrient agar at 37°C, by the conventional boiling method, as described [28]. Briefly, one loopful  
154 of bacterial cells was suspended in 1ml of sterile distilled water. The bacterial suspensions were  
155 then heated for 5 min at 100°C, cooled to room temperature and centrifuged at 12,000 xg for 5 min  
156 to remove the debris. The supernatant was stored at -20°C and used as the template DNA for PCR  
157 analysis.

## 158 **Detection of beta-glucuronidase (*uidA*) gene for confirmation of *E.*** 159 ***coli***

160 The confirmation of *E. coli* was achieved by polymerase chain reaction (PCR) detection of  
161 the target beta-glucuronidase (*uidA*). This was done at the School of Natural Sciences, Bangor  
162 University, United Kingdom, following the procedures described [29, 30]. The extracted DNA  
163 were cleaned using QIAGEN (QIAEX®II) gel extraction kits and kept at -20°C. PCRs were carried  
164 out with BIORAD DNA Engine Tetrad®Peltier Thermal Cycler (BIORAD, USA). The PCR  
165 reaction mixtures consisted of 25 µl of PCR Master Mix (Thermo Scientific, (EU) Lithuania), 0.5  
166 µl each of oligonucleotide primers (Eurofins Genomics, Ebersberg Germany), 10 µl of template  
167 DNA and 14 µl of nuclease free water to constitute a total reaction volume of 50 µl. The PCR  
168 cycling conditions, with some modifications, were in accordance with the protocols prescribed  
169 elsewhere [31]. *E. coli* strain (NCTC 13353) and *Enterobacter aerogenes* (NCTC 10006) were  
170 used as positive and negative controls respectively for *E. coli* genus identification. The  
171 oligonucleotide sequence of primers used, target genes and expected amplification products are  
172 given in Table 1. For gel electrophoresis, 3 µl of DNA ladder (1 Kb Plus DNA Ladder; Invitrogen),  
173 6 µl of positive control and 10µl of template DNA were ran on 2.5% (w/v) agarose gels in 1x-TBE  
174 buffer (0.09 M Tris-borate and 0.002 M EDTA, pH 8.0) at 100V for 25-30 min. The gels were  
175 viewed and photographed with BIORAD Molecular Imager® Gel Doc™ XR Imaging System  
176 (BIORAD, USA).

## 177 **Antibiotic susceptibility testing**

178 Isolates were subjected to antibiotic susceptibility testing using the Kirby-Bauer disc  
179 diffusion test [26]. Evaluation of results was based on the standards of the Clinical Laboratory  
180 Standards Institute (CLSI) [27]. Briefly, isolates grown on nutrient broth were suspended into  
181 sterile normal saline (0.9% (w/v) NaCl) with the aid of a sterile wire loop until the turbidity  
182 equivalent of 0.5 McFarland standard was reached. Sterile non-toxic cotton swabs were dipped  
183 into the standardized inoculum and used to smear the entire surface of the Muller-Hinton agar  
184 (Thermo Fisher Scientific, USA) plates. Antibiotic discs were placed aseptically using sterile  
185 forceps. All plates were incubated at 35±2oC for 16 to 18 h. The following antibiotics were  
186 employed for the test: Amoxycillin (AMX) 10µg, Ampicillin (AMP) 10µg, Metronidazole (MTZ)  
187 5µg, Rifampicin (RIF) 5µg, Vancomycin (VAN) 30µg, Cloxacillin (COX) 5µg, Penicillin G  
188 (PNG) 10iu, Streptomycin (STR) 10µg, Erythromycin (ERT) 15µg, Clarithromycin (CLR) 15µg,

189 Cefuroxime (CXM) 30µg, Chloramphenicol (CHL) 30µg, Imipenem (IPM) 10µg, Tetracycline  
190 (TET) 30µg, Ciprofloxacin (CIP) 5µg, Trimethoprim (TMP) 5µg, Norfloxacin (NOR) 10µg,  
191 Sulphamethoxazole (SMZ) 25µg. The *E. coli* ATCC 25922 strains was used as control for  
192 antibiotic susceptibility testing. Zones showing complete inhibition around the discs were  
193 measured and classified as resistant (R), intermediate (I) and susceptible (S) according to the  
194 diameters of the zones recorded to the nearest millimetres.

## 195 **Detection of integrons**

196 The isolates were screened for class 1, 2 and 3 integrons by a multiplex PCR procedure as  
197 described by Machado *et al.* [32] and Karger *et al.* [33]. The PCR reactions (a total volume of 50µl  
198 reaction mixture) each consisted of consisting of 10 µl Buffer of 5x MyTaq Reaction Buffer  
199 (Bioline, with dye), 0.75µl of each the primers *intI1*, *intI2* and *intI3* (Eurofins Genomics,  
200 Ebersberg, Germany.), 27.25µl nuclease free water (Sigma-Aldrich), 0.25µl MyTaq DNA  
201 polymerase (Bioline) and 5µl DNA template. For gel electrophoresis, 3µl of DNA ladder (1 Kb  
202 Plus DNA Ladder; Invitrogen), 6 µl of positive control and 10 µl of samples were ran on 1.5%  
203 (w/v) agarose gels in 1x-TBE buffer (0.09 M Tris-borate and 0.002 M EDTA, pH 8.0) at 100 V  
204 for 25 min. The gels were viewed and photographed with BIORAD Molecular Imager® Gel Doc™  
205 XR Imaging System.

206

207

208

209 **Table 1: Primers for the detection of *E. coli* and integrons**

| <b>Genetic marker</b>           | <b>Primer name and sequence (5' to 3')</b> |                                                  | <b>Amplicon size (bp)</b> | <b>Thermocycling conditions</b>                                                                                                                                                                               | <b>Reference</b> |
|---------------------------------|--------------------------------------------|--------------------------------------------------|---------------------------|---------------------------------------------------------------------------------------------------------------------------------------------------------------------------------------------------------------|------------------|
| <i>uidA</i>                     | UAL-754                                    | AAAACGGCAAGAAAAAGCAG                             | 147                       | Initial activation at 95°C for 3 min, followed by 40 cycles consisting of denaturing at 94°C for 1 min, annealing at 65°C for 1 min, extension at 70°C for 1 min and final elongation at 72°C for 7 min       | [29, 30]         |
| (beta-glucuronidase)            | UAR-900                                    | ACGCGTGGTTACAGTCTTGCG                            |                           |                                                                                                                                                                                                               |                  |
| <i>intI1</i> (Class 1 integron) | Int1-F<br>Int1-R                           | GGTCAAGGATCTGGATTTTCG<br>ACATGCGTGTAATCATCGTC    | 436                       | Initial activation step at 94°C for 5 min, followed by 32 cycles consisting of denaturing at 94°C for 1 min, annealing at 60°C for 1 min, extension at 72°C for 2 min and final elongation at 72°C for 10 min | [32, 33]         |
| <i>intI2</i> (Class 2 integron) | Int2-F<br>Int2-R                           | CACGGATATGCGACAAAAAGGT<br>GTAGCAAACGAGTGACGAAATG | 788                       |                                                                                                                                                                                                               |                  |
| <i>intI3</i> (Class 3 integron) | Int3-F<br>Int3-R                           | AGTGGGTGGCGAATGAGTG<br>TGTTCTTGTATCGGCAGGTG      | 600                       |                                                                                                                                                                                                               |                  |



## 211 **Results and Discussion**

212 It is worthy of note the amaranths irrigated with wastewater effluent were of higher yields  
213 compared to the controls irrigated with tap water. This is attributable to the fact the effluent is rich  
214 in nutrients. It also underscores the continued preference of effluents over the scarce treated water  
215 by the vegetable farmers. Despite a perceived understanding farmer have on the use of unsafe  
216 WWTP effluent, this knowledge seems not bother them.

217 In the present study, the total number of samples collected were 288 including WWTP  
218 effluents (60), greenhouse (60), farm (84) and market (84) vegetables. A total of 178 *E. coli* isolates  
219 were confirmed by PCR amplification of the  $\beta$ -glucuronidase *uidA* gene (Fig 1), with 41 isolates  
220 from the WWTP effluents, 46 greenhouse from the effluent irrigated vegetables, 55 from  
221 vegetables collected from gardens that produce vegetables sold in local markets and 36 from  
222 vegetables bought from selected markets in Nsukka and Enugu (Table 2).

223

### 224 **Fig 1. PCR products for *E. coli* confirmation by *uidA* gene amplification.**

225 This is the Fig 1 legend: M: Molecular weight marker (1 KB), W: water, NC: Negative control  
226 (*Enterobacter aerogenes*), PC: Positive control (*E. coli*; NCTC 13353), Lanes 1-15: Positive  
227 isolates

228

### 229 **Table 2: Isolation of *E. coli* in effluent wastewater and vegetable samples.**

230

| Sample type           | No. of samples | No. of <i>E. coli</i> isolates |
|-----------------------|----------------|--------------------------------|
| WWTP effluent         | 60             | 41                             |
| Greenhouse vegetables | 60             | 46                             |
| Farm vegetables       | 84             | 55                             |
| Market Vegetables     | 84             | 36                             |
| <b>Total</b>          | <b>288</b>     | <b>178</b>                     |

231

232 Table 3 shows the antibiotics susceptibility profiles of the 178 *E. coli* isolates tested with  
233 18 different antibiotics. Generally, higher resistance percentages were observed in *E. coli* from  
234 market vegetables compared with others. This could be attributable to further contamination of  
235 vegetables by clinical *E. coli* strains arising directly from handling by sellers. All the *E. coli*  
236 isolates, showed susceptibility to imipenem and only 5.6% (10/178) of all the isolates were  
237 resistant to cefuroxime (a cephalosporin). Chloramphenicol, ciprofloxacin and norfloxacin were  
238 very effective. The most significant resistance phenotypes were detected among  
239 sulphamethoxazole (58.4%), amoxicillin (52.8%), tetracycline (47.2%), trimethoprim (44.9%) and  
240 streptomycin (37.1%), as these antibiotics are commonly used in the studied communities (Table  
241 2).

242

243

244

245

246

247

248

249

250

251

252

253

254

255

256

257

258

259

260 **Table 3: Antibiotics susceptibility profile of *E. coli* isolates**

| S/N | Antimicrobial Agent<br>(disc concentration) | Class (Subclasses)                           | Code | Number of isolates resistant (%) |                        |                  |                    |                    |
|-----|---------------------------------------------|----------------------------------------------|------|----------------------------------|------------------------|------------------|--------------------|--------------------|
|     |                                             |                                              |      | Effluent<br>(n = 41)             | Greenhouse<br>(n = 46) | Farm<br>(n = 55) | Market<br>(n = 36) | TOTAL<br>(n = 178) |
| 1   | Cloxacillin (5µg)                           | β-Lactam (Penicillins)                       | COX  | 41 (100)                         | 46 (100)               | 55 (100)         | 36 (100)           | 178 (100)          |
| 2   | Metronidazole (50µg)                        | Nitroimidazoles                              | MTZ  | 41 (100)                         | 46 (100)               | 55 (100)         | 36 (100)           | 178 (100)          |
| 3   | Vancomycin (30µg)                           | Glycopeptides                                | VAN  | 41 (100)                         | 46 (100)               | 53 (96.4)        | 36 (100)           | 176 (98.9)         |
| 4   | Rifampicin (5µg)                            | Rifamycins                                   | RIF  | 41 (100)                         | 45 (97.8)              | 52 (94.6)        | 34 (94.4)          | 172 (96.6)         |
| 5   | Penicillin (10U)                            | β-Lactam (Penicillins)                       | PNG  | 39 (95.1)                        | 45 (97.8)              | 54 (98.2)        | 34 (94.4)          | 172 (96.6)         |
| 6   | Erythromycin (15µg)                         | Macrolides                                   | ERT  | 40 (97.6)                        | 46 (100)               | 50 (90.9)        | 32 (88.9)          | 168 (94.4)         |
| 7   | Clarithromycin (15µg)                       | Macrolides                                   | CLR  | 40 (97.6)                        | 37 (80.4)              | 47 (85.5)        | 36 (100)           | 160 (89.9)         |
| 8   | Ampicillin (5µg)                            | β-Lactam (Cephalosporins)                    | AMP  | 34 (82.9)                        | 38 (82.6)              | 50 (90.9)        | 36 (100)           | 158 (88.7)         |
| 9   | Sulphamethoxazole (25µg)                    | Sulphonamides                                | SMZ  | 23 (56.1)                        | 27 (58.7)              | 26 (47.3)        | 28 (77.8)          | 104 (58.4)         |
| 10  | Amoxicillin (10µg)                          | β-Lactam (Penicillins)                       | AMX  | 23 (56.1)                        | 24 (52.2)              | 26 (47.3)        | 21 (58.3)          | 94 (52.8)          |
| 11  | Tetracycline (30µg)                         | Tetracyclines                                | TET  | 25 (61.0)                        | 20 (43.5)              | 16 (29.1)        | 23 (63.9)          | 84 (47.2)          |
| 12  | Trimethoprim (5µg)                          | Dihydrofolate Reductase<br>(DHFR) inhibitors | TMP  | 27 (65.9)                        | 20 (43.5)              | 12 (21.8)        | 21 (58.3)          | 80 (44.9)          |
| 13  | Streptomycin (10µg)                         | Aminoglycosides                              | STR  | 15 (36.6)                        | 21 (45.7)              | 16 (29.1)        | 14 (38.9)          | 66 (37.1)          |
| 14  | Chloramphenicol (30µg)                      | Phenicols                                    | CHL  | 4 (9.8)                          | 6 (13.0)               | 6 (10.9)         | 9 (25.0)           | 25 (14.0)          |
| 15  | Ciprofloxacin (5µg)                         | Fluoroquinolones                             | CIP  | 5 (12.2)                         | 7 (15.2)               | 6 (10.9)         | 7 (19.4)           | 25 (14.0)          |
| 16  | Norfloxacin (10µg)                          | Fluoroquinolones                             | NOR  | 2 (4.9)                          | 7 (15.2)               | 9 (16.4)         | 5 (13.9)           | 23 (12.9)          |
| 17  | Cefuroxime (30µg)                           | β-Lactam (Cephalosporins)                    | CXM  | 2 (4.9)                          | 2 (4.4)                | 2 (3.6)          | 4 (11.1)           | 10 (5.6)           |
| 18  | Imipenem (10µg)                             | β-Lactam (Carbapenems)                       | IMP  | 0 (0.0)                          | 0 (0.0)                | 0 (0.0)          | 0 (0.0)            | 0 (0.0)            |

261

262

263

264 Multidrug resistance (MDR) has been frequently reported in Nigeria among *E. coli* isolates  
265 obtained from human specimens [12, 37, 42, 43], animal sources [36] and environmental samples  
266 [38, 42, 44, 45]. In the present study, all the isolates were multidrug resistant, ranging from 5-drug  
267 to 16-drug resistance patterns. Although some studies have reported a high removal efficiency for  
268 total ARGs in wastewater [46], our data suggest that sewage treatment process at UNN is not  
269 effective in reducing ARGs as all the *E. coli* isolated from the effluent were MDR. The spread of  
270 AMR often limits the availability of therapeutic options to only a very few efficacious antibiotics  
271 [47]. The last-resort drugs, the carbapenems such as imipenem (used in this study) and meropenem,  
272 are themselves not only increasingly challenged by emerging resistance, as evident from the data  
273 presented here, but are not affordable in the developing regions.

274 Multidrug resistance (MDR) was detected in all *E. coli* isolates, and although this study  
275 did not determine the full virulence potentials of all the isolates subjected to antimicrobial  
276 susceptibility testing (AST), irrigational use of WWTP effluent represents a pathway for human  
277 exposure to antibiotic-resistant commensal and pathogenic bacteria. Vegetable farming at the site  
278 should therefore be discontinued as it presents significant threat to the health of consumers of such  
279 vegetables.

280 It is known that AMR and MDR in *E. coli* are acquired by the transfer of mobile genetic  
281 elements, such as plasmids, transposons and integrons [15, 18, 20]. In the present study, of the 178  
282 *E. coli* isolates, class 1 integrons were detected (Fig 2) in 175 (98.3%), and class 2 in 5 (2.8%). All  
283 the class 2 integrons were found in isolates that were positive for class 1. Such co-carriage has  
284 been previously published on *E. coli* from meat turkeys in Italy, [34].

285

## 286 **Fig 2. Multiplex PCR products for detection of class 1 and 2 integrons**

287 This is the Fig 2 legend: M: Molecular weight marker (1 KB Plus ladder), W: water, Lanes 1-15:  
288 *E. coli* isolates

289

290 The integron carriage rate for the 137 vegetable isolates was 97.8%, whereas the rate for  
291 41 effluent isolates was 100%. Considering that all the isolates were MDR, the detected high

292 prevalence of class 1 integron is not surprising and compares with a previous study that reported  
293 that MDR phenotypes were observed in 96.8% of the integron-positive isolates [35]. These rates  
294 portend serious public health risks as it is known that class 1 integron could carry diverse antibiotic  
295 resistance genes (ARGs) and conduct horizontal gene transfer among microorganisms [20].

296 The data presented here shows that class 2 integrons were less frequently detected 5 (2.8%).  
297 Similar data have been published for Enterobacteriaceae in Nigeria [36, 38] and elsewhere [34, 39,  
298 40]. Ramírez et al [39], reported that unlike the widespread distribution of class 1 integron within  
299 Gram-negative bacilli, only *Acinetobacter baumannii* and *Enterobacter cloacae* harboured class 2  
300 integrons at a high frequency. However, in an earlier study in China [41], Class 2 integrons were  
301 present in 25 (80.6%) of the *Shigella sonnei* isolates and 29 (87.9%) of the *S. flexneri* isolates  
302 whereas class 1 integrons were found in only 6 (9.4%) of *Shigella* spp. isolates.

## 303 **Conclusions**

304 The present study revealed high detection of *E. coli* in the studied effluent and vegetable  
305 samples and represent potential public health hazards intensified by observed multidrug resistance  
306 in all the isolates and the high occurrence of class 1 integrons. It is concluded that UNN-WWTP  
307 is a significant reservoir for diarrheagenic *E. coli*. Vegetable farming at the site should therefore  
308 be discouraged as it presents significant threat to the health of consumers of such vegetables.

## 309 **Acknowledgments**

310 The authors are also grateful to Mr. Uchenna Oyeagu of the Water and Public Health  
311 Laboratory, University of Nigeria, Nsukka, Nigeria, for laboratory assistance.

312

## 313 **References**

- 314 1. Stacy-Phipps S, Mecca JJ, Weiss JB (1995) Multiplex PCR Assay and Simple Preparation  
315 Method for Stool Specimens Detect Enterotoxigenic *Escherichia coli* DNA during Course  
316 of Infection. *J Clin Microbiol* 33: 1054–1059.
- 317 2. Okeke IN (2009) Diarrheagenic *Escherichia coli* in sub-Saharan Africa: status,  
318 uncertainties and necessities. *J Infect Dev Ctries* 3: 817–842.
- 319 3. Brown JW, Badahdah A, Iticovici M, Vickers TJ, Alvarado DM, Helmerhorst EJ,  
320 Oppenheim FG, Mills JC, Ciorba MA, Fleckenstein JM. Bullitt E (2018) A Role for

- 321 Salivary Peptides in the Innate Defense Against Enterotoxigenic *Escherichia coli* J Infect  
322 Dis. 217:1435–1441
- 323 4. Nzeako B, Okafor N (2002) Bacterial enteropathogens and factors associated with seasonal  
324 episodes of gastroenteritis in Nsukka, Nigeria. Br J Biomed Sci 59: 76–79.
- 325 5. WHO/UNICEF [World Health Organization and the United Nations Children’s Fund]  
326 (2017). Progress on drinking water, sanitation and hygiene: 2017 update and SDG  
327 baselines. Geneva; 2017. Licence: CC BY-NC-SA 3.0 IGO.
- 328 6. FAO/WHO [Food and Agriculture Organization of the United Nations and World Health  
329 Organization]. (2008). Microbiological hazards in fresh leafy vegetables and herbs:  
330 Meeting Report. Microbiological Risk Assessment Series No. 14. Rome. 151pp.
- 331 7. Ogunsanya TL, Rotimi VO, Adenuga A (1994) Study of the aetiological agents of  
332 childhood diarrhoea in Lagos Nigeria. J Med Microbiol 40: 10–14.
- 333 8. Okeke IN, Fayinka ST, Lamikanra A (2000) Antibiotic Resistance in *Escherichia coli* from  
334 Nigerian Students, 1986–1998. Emerg Infect Dis 6: 393–396.
- 335 9. Olorunshola ID, Smith SI, Coker AO (2000) Prevalence of EHEC O157: H7 in patients  
336 with diarrhea in Lagos, Nigeria APMIS 108: 761–763.
- 337 10. Okeke IN, Steinruck H, Kanack KJ, Elliott SJ, Sundstrom L, Kaper JB, Lamikanra A  
338 (2002) Antibiotic-resistant cell-detaching *Escherichia coli* strains from Nigerian children.  
339 J Clin Microbiol 40: 301–305.
- 340 11. Chigor VN, Umoh VJ, Smith SI, Igbinsosa EO, Okoh AI (2010) Multidrug resistance and  
341 plasmid patterns of *Escherichia coli* O157 and other *E. coli* isolated from diarrhoeal stools  
342 and surface waters from some selected sources in Zaria, Nigeria. Int J Environ Res Public  
343 Health 7: 3831–3841.
- 344 12. Onanuga A, Igbeneghu O, Lamikanra A (2014) A study of the prevalence of diarrhoeagenic  
345 *Escherichia coli* in children from Gwagwalada, Federal Capital Territory, Nigeria. Pan Afr  
346 Med J 17: 146.
- 347 13. Nweze EI (2010) Aetiology of Diarrhoea and Virulence Properties of Diarrhoeagenic  
348 *Escherichia coli* among Patients and Healthy Subjects in Southeast Nigeria. J Health Popul  
349 Nutr 28:245–252.
- 350 14. Okeke IN, Edelman R (2001) Dissemination of antibiotic-resistant bacteria across  
351 geographic borders. CID 33: 363–369.
- 352 15. Gaze WH, Zhang L, Abdouslam NA, Hawkey PM, Calvo-Bado L, Royle J, Brown H,  
353 Davis S, Kay P, Boxall ABA, Wellington EMH (2011) Impacts of anthropogenic activity  
354 on the ecology of class 1 integrons and integron-associated genes in the environment. The  
355 ISME J 5: 1253–1261.
- 356 16. Wellington EMH, Boxall ABA, Cross P, Feil EJ, Gaze WH, Hawkey PM, Johnson-  
357 Rollings AS, Jones DL, Lee NM, Otten W, Thomas CM, Williams AP (2013) The role of  
358 the natural environment in the emergence of antibiotic resistance in Gram-negative  
359 bacteria. Lancet Infect Dis 13: 155–165.
- 360 17. Amos GCA, Zhang L, Hawkey PM, Gaze WH, Wellington EM (2014) Functional  
361 metagenomic analysis reveals rivers are a reservoir for diverse antibiotic resistance genes.  
362 Vet Microbiol 171: 441–447.
- 363 18. Gillings MR (2014) Integrons: Past, Present, and Future. Microbiol Mol Biol Rev 78: 257–  
364 277.

- 365 19. Strugeon E, Tilloy V, Ploy MC, Da Re S (2016) The stringent response promotes antibiotic  
366 resistance dissemination by regulating integron integrase expression in biofilms. *mBio*  
367 7(4):e00868–16.
- 368 20. Ma L, Li AD, Yin XL, Zhang T (2017) The Prevalence of Integrons as the Carrier of  
369 Antibiotic Resistance Genes in Natural and Man-Made Environments. *Environ Sci*  
370 *Technol* 51: 5721–5728.
- 371 21. Asadu A, Enwelu I, Ifejika P, Igbokwe E (2016) Urban crop production in southeast  
372 Nigeria: Potentials and constraints. *Afr J Agric Res* 11: 4646–4653.
- 373 22. American Public Health Association (APHA) (2005). Standard Methods for the  
374 Examination of Water and Wastewater. 21st Edn. American Public Health Association,  
375 American Water Works Association, Water Environment Federation, Washington DC,  
376 USA.
- 377 23. Falomir MP, Gozalbo D, Rico H (2010) Coliform bacteria in fresh vegetables: from  
378 cultivated lands to consumers. In: A. Mandez-Vilas (Ed.). Current Research, Technology  
379 and Education Topics in Applied Microbiology and Microbial Biotechnology.  
380 FORMATEX; Badajoz Spain, pp. 1175–1181.
- 381 24. Saeed AY, Mazin H, Saadi A, Hussein SO (2013) Detection of *Escherichia coli* O157 in  
382 vegetables. *IOSR J Agric Vet Sci* 6: 16–18.
- 383 25. Claus D (1992) A standardized Gram staining procedure. *World J Microbiol Biotechnol*  
384 8:451–452.
- 385 26. Bauer A, Kirby W, Sherris J, Turck M (1966) Antibiotic susceptibility testing by a  
386 standardized single disk method. *Am J Clin Pathol* 45:493–496.
- 387 27. CLSI (2012) Performance Standards for Antimicrobial Disk Susceptibility Tests;  
388 Approved Standard—Eleventh Edition. Vol 32, No.1.
- 389 28. Vankerckhoven V, Van Autgaerden T, Vael C, Lammens C, Chapelle S, Rossi R, Jabes D,  
390 Goossens H (2004) Development of a Multiplex PCR for the Detection of *asa1*, *gelE*, *cylA*,  
391 *esp*, and *hyl* Genes in Enterococci and Survey for Virulence Determinants among European  
392 Hospital Isolates of *Enterococcus faecium*. *J Clin Microbiol* 42: 4473–4479.
- 393 29. Bej AK, Dicesare JL, Haff L, Atlas RM (1991) Detection of *Escherichia coli* and *Shigella*  
394 spp. in Water by Using the Polymerase Chain Reaction and Gene Probes for *uid*. *Appl*  
395 *Environ Microbiol* 57: 1013–1017.
- 396 30. Horakova K, Mlejnkova H, Mlejnek P (2008) Specific detection of *Escherichia coli*  
397 isolated from water samples using polymerase chain reaction targeting four genes:  
398 cytochrome bd complex, lactose permease, b-D-glucuronidase, and b-D-galactosidase. *J*  
399 *Appl Microbiol* 105: 970–976.
- 400 31. Lopez-Saucedo C, Cerna JF, Villegas-Sepulveda N, Thompson R, Velazquez FR, Torres  
401 J, Tarr PI, Estrada-García T (2003) Single multiplex polymerase chain reaction to detect  
402 diverse loci associated with diarrhoeagenic *Escherichia coli*. *Emerg Infect Dis* 9: 127–131.
- 403 32. Machado E, Canton R, Baquero F, Galan JC, Rollan A, Peixe L, Coque TM (2005) Integron  
404 Content of Extended-Spectrum--Lactamase-Producing *Escherichia coli* Strains over 12  
405 Years in a Single Hospital in Madrid, Spain. *Antimicrob Agents Chemother* 49: 1823–  
406 1829.
- 407 33. Kargar M, Mohammadalipour Z, Doosti A, Lorzadeh S, Japoni-Nejad A (2014) High  
408 Prevalence of Class 1 to 3 Integrons Among Multidrug-Resistant Diarrheagenic  
409 *Escherichia coli* in Southwest of Iran. *Osong Public Health Res Perspect* 5: 193–198.

- 410 34. Piccirillo A, Giovanardi D, Dotto G, Grilli G, Montesissa, C, Boldrin C, Salata C,  
411 Giacomelli M (2014) Antimicrobial resistance and class 1 and 2 integrons in *Escherichia*  
412 *coli* from meat turkeys in Northern Italy. *Avian Pathol* 43: 396–405.
- 413 35. Vasilakopoulou A, Psychogiou M, Tzouvelekis L, Tassios PT, Kosmidis C, Petrikkos G,  
414 Roma ES, Charvalos E, Passiotou M, Avlami A, Daikos GL (2009) Prevalence and  
415 characterization of class 1 integrons in *Escherichia coli* of poultry and human origin.  
416 *Foodborne Pathog Dis* 6: 1211–1218.
- 417 36. Chah KF, Agbo IC, Eze DC, Somalo S, Estepa V, Torres C (2010) Antimicrobial  
418 resistance, integrons and plasmid replicon typing in multiresistant clinical *Escherichia coli*  
419 strains from Enugu State, Nigeria. *J Basic Microbiol* 50: S18–S24.
- 420 37. Odetoyin BW, Labar AS, Lamikanra A, Aboderin AO, Okeke IN (2017) Class 1 and 2  
421 integrons in faecal *Escherichia coli* strains isolated from mother-child pairs in Nigeria.  
422 *PLoS ONE* 12: e0183383.
- 423 38. Adelowo OO, Helbig T, Knecht C, Reincke F, Mäusezahl I, Müller JA (2018) High  
424 abundances of class 1 integrase and sulfonamide resistance genes, and characterisation of  
425 class 1 integron gene cassettes in four urban wetlands in Nigeria. *PLoS ONE* 13: e0208269.
- 426 39. Ramírez MS, Pineiro S, Argentinian Integron Study Group, Centron D (2010) Novel  
427 Insights about Class 2 Integrons from Experimental and Genomic Epidemiology.  
428 *Antimicrob Agents Chemother* 54: 699–706.
- 429 40. Malek MM, Amer FA, Allam AA, El-Sokkary RH, Gheith T, Arafa MA (2015) Occurrence  
430 of class I and II integrons in Enterobacteriaceae collected from Zagazig University  
431 Hospitals, Egypt. *Front Microbiol* 6: 601.
- 432 41. Pan JC, Ye R, Meng DM, Zhang W, Wang HO, Liu KZ (2006) Molecular characteristics  
433 of class 1 and class 2 integrons and their relationships to antibiotic resistance in clinical  
434 isolates of *Shigella sonnei* and *Shigella flexneri*. *J Antimicrob Chemother* 58: 288–296.
- 435 42. Chigor VN, Umoh VJ, Smith SI, Igbiosa EO, Okoh AI (2010) Multidrug resistance and  
436 plasmid patterns of *Escherichia coli* O157 and other *E. coli* isolated from diarrhoeal stools  
437 and surface waters from some selected sources in Zaria, Nigeria. *Int J Environ Res Public*  
438 *Health* 7: 3831–3841.
- 439 43. Okeke IN, Lamikanra A, Czczulin J, Dubovsky F, Kaper JB, Nataro JP (2000b)  
440 Heterogeneous Virulence of Enteroaggregative *Escherichia coli* Strains Isolated from  
441 Children in Southwest Nigeria. *J Infect Dis* 181: 252–260.
- 442 44. Smith SI, Bello OS, Goodluck HA, Omonigbehin EA, Agbogu VN, Odeigah P (2009)  
443 Prevalence of EHEC O157:H7 from human and environmental samples from Lagos and  
444 Zaria. *Pakistan J Med Sci* 25: 398–403.
- 445 45. Titilawo Y, Sibanda T, Obi L, Okoh A (2015a) Multiple antibiotic resistance indexing of  
446 *Escherichia coli* to identify high-risk sources of faecal contamination of water. *Environ Sci*  
447 *Pollut Res* 22: 10969–10989.
- 448 46. Yang Y, Li B, Zou S, Fang HHP, Zhang T (2014) Fate of antibiotic resistance genes in  
449 sewage treatment plant revealed by metagenomic approach. *Water Res* 62: 97–106.
- 450 47. Juhas M, Widlake E, Teo J, Huseby DL, Tyrrell JM, Polikanov YS, Ercan O, Petersson A,  
451 Cao S, Aboklaish AF, Rominski A, Crich D, Bottger EC, Walsh TR, Hughes D, Hobbie  
452 SN (2019) In vitro activity of apramycin against multidrug-, carbapenem- and  
453 aminoglycoside-resistant Enterobacteriaceae and *Acinetobacter baumannii*. *J Antimicrob*  
454 *Chemother* 74: 944–952.
- 455



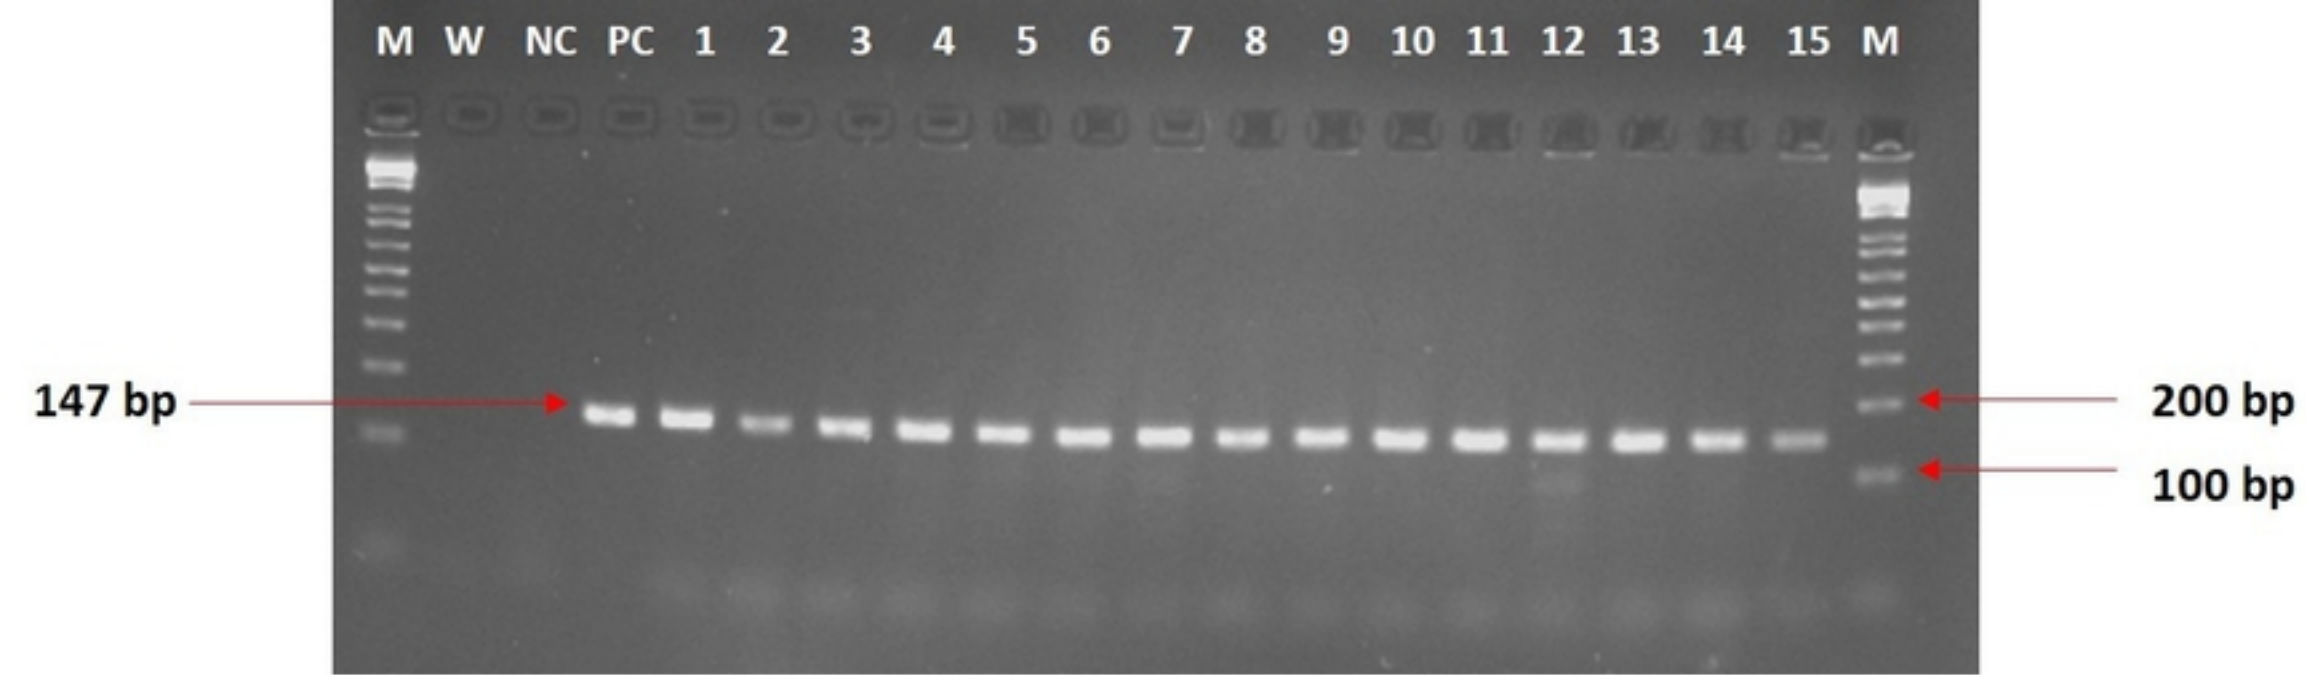

Figure 1

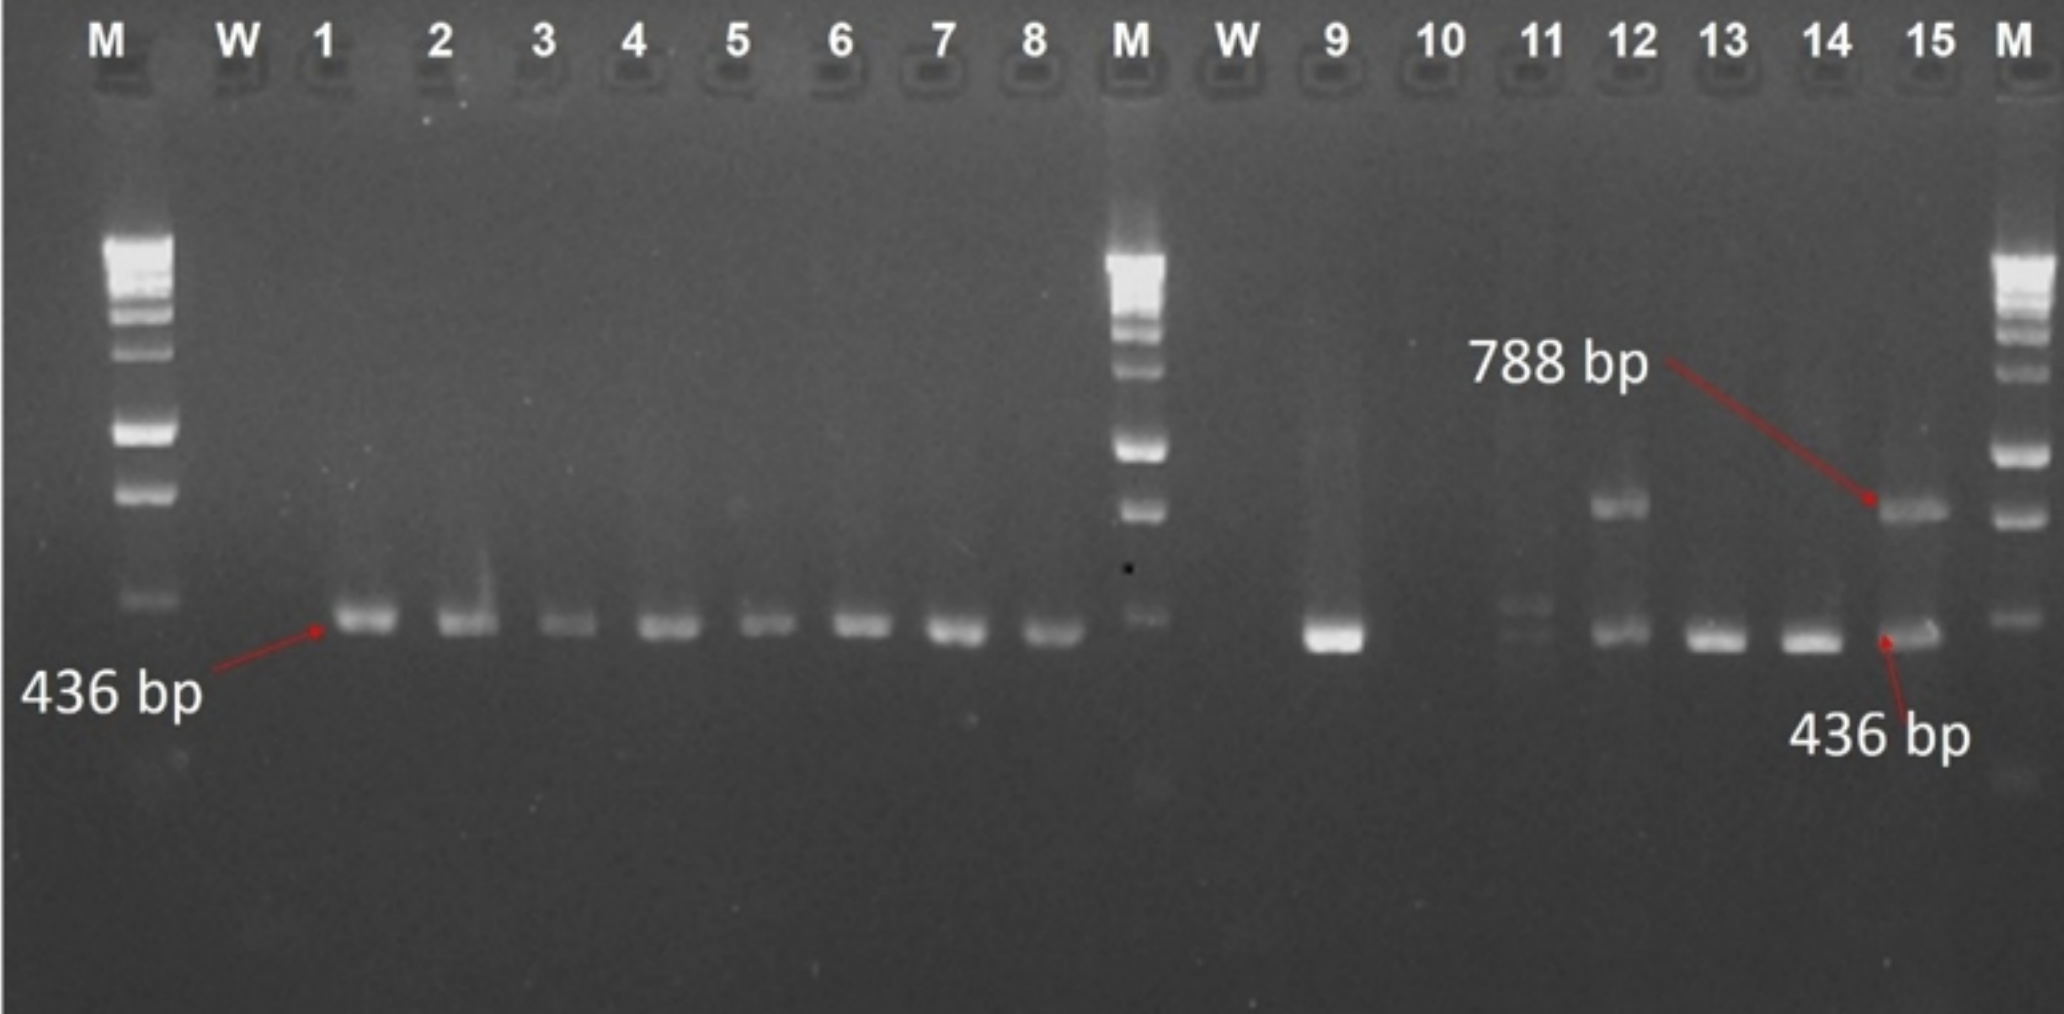

Figure 2
